# **Healthcare services access, use, and barriers among migrants in Europe: a systematic review**

**Petros Galanis**, Assistant Professor, Clinical Epidemiology Laboratory, Faculty of Nursing, National and Kapodistrian University of Athens, Greece

**Koureas Spyros**, MSc, PhD (c), National and Kapodistrian University of Athens, Greece

**Olga Siskou**, Assistant Professor, University of Piraeus, Greece

**Olympia Konstantakopoulou**, Economist, MSc, PhD, Center for Health Services Management and Evaluation, National and Kapodistrian University of Athens, Greece

**Georgios Angelopoulos**, Economist, MSc, Center for Health Services Management and Evaluation, National and Kapodistrian University of Athens, Greece

**Daphne Kaitelidou**, Professor, Center for Health Services Management and Evaluation, National and Kapodistrian University of Athens, Greece

**Corresponding author:** Petros Galanis, Assistant Professor, Clinical Epidemiology Laboratory, Faculty of Nursing, National and Kapodistrian University of Athens, Greece, 123 Papdiamantopoulou street, GR-11527, Athens, Greece, Tel:+30210.7781044, e-mail: pegalan@nurs.uoa.gr

**Funding:** National and Kapodistrian University of Athens and “Stavros Niarchos Foundation”

## **Abstract**

**Background:** The issue of migrants health and access to health services is dynamic and complex posing a challenge to health systems worldwide.

**Aim:** To investigate migrants' access to health services in European countries, the use of health services by migrants and the barriers encountered by migrants in the use of health services.

**Material and methods:** The search was conducted in January 2022 in five databases; PubMed, Medline, Web of science, Scopus and Cinahl. We used the following keywords: migrants, immigrants, use, access, utilization, healthcare services, services, needs, health, difficulties, barriers. The inclusion criteria were the following: (a) the studies investigated the access of migrants to health services, the use of health services by migrants and the barriers encountered by migrants in using health services. (b) migrants self-assessed access, use and barriers. (c) studies were conducted in European countries. (d) studies included adult migrants. (e) the language of articles was English.

**Results:** Sixty-five studies were met our inclusion criteria. among studies, 89.2% were quantitative and 11.8% were qualitative. All quantitative studies were cross-sectional. for data collection, 58.5% of studies used questionnaires and 30.8% used historical files. Also, personal interviews were performed in 9.2% of studies and focus groups in 1.5% of studies. in our studies, 73.8% of natives stated that they had better access to health services and used health services better than migrants, while 26.2% found that migrants stated that they had better access to health services and used health services better. The most common barriers were the following: inability to understand the language and communicate, lack of insurance, lack of information and knowledge, lack of family support, low educational level, short duration of stay in the country of migration, low income, lack of a family doctor and high costs.

**Conclusions:** Migrants face several barriers both in accessing and using health services in Europe. Intensive efforts are needed to increase migrants' knowledge, implement culturally sensitive interventions in migrant communities and better inform healthcare professionals so that they can approach migrants more effectively.

**Keywords:** migrants, Europe, access, use, barriers, healthcare, services

## Introduction

The high mobility of populations, the economic crisis and the significant increase in unemployment have defined the last decades, with the economic crisis affecting vulnerable groups, such as migrants. Thus, a particular aspect of health inequalities has emerged, which mainly concerns the barriers and difficulties encountered by migrants in accessing healthcare services, which has a direct impact on the quality of the services provided. The Americas is the continent with the largest number of migrants, with the number increasing from 47 million in 2000 to 60 million in 2012 (Loue & Sajatovic, 2012). The situation is similar in Europe, with migrants making up around 9% of the total population (Loue & Sajatovic, 2012). In fact, in Europe, 7-13% of migrants do not have legal residence documents (Karl-Trummer et al., 2010).

Access to high quality health services is an extremely important issue for migrants, as they face unequal opportunities for treatment interventions (The Lancet Public Health, 2018). The growing migrant population is also reflected in the increasing need for health services. For this reason, a corresponding adjustment of health policies at international level is required to better provide health care for migrants (Macpherson et al., 2007). Indeed, in recent years the issue of migrants' health has expanded from providing health care to patients to health promotion and prevention. The World Health Organization plays an essential role in better addressing health issues related to migrants (World Health Organization, 2008).

The issue of migrants health and access to health services is dynamic and complex, involving different stages of migration such as the pre-migration period, the first years of migration and migrants after several years of residence in the host country (Lassetter & Callister, 2009; Ullmann et al., 2011). Furthermore, this issue is also related to various social determinants that are not only related to the characteristics of migrants, e.g. gender, cultural diversity, experiences, etc., but also to the cultural environment of the host countries, e.g. the health care system, living conditions, moral, religious and cultural values, etc. (Malmusi et al., 2010; Spallek et al., 2011).

Migrants and their children are less often insured and use health services less often than natives (Abe-Kim et al., 2007; Alegría et al., 2006; Callahan et al., 2006;

Cunningham, 2006; Guendelman et al., 2001; Huang et al., 2006; Jackson et al., 2007; Javier et al., 2007; Lasser et al., 2006; Yu et al., 2006). In addition, the cost of health care for migrants is lower, with the exception of the cost of emergency care for migrant children (Derose et al., 2009).

The aim of this systematic literature review was to investigate migrants' access to health services, the use of health services by migrants and the barriers encountered by migrants in the use of health services.

## Material and Methods

The search was conducted in January 2022 in five databases; PubMed, Medline, Web of Science, Scopus and Cinahl. We used the following key-words: migrants, immigrants, use, access, utilization, healthcare services, services, needs, health, difficulties, barriers.

The inclusion criteria were the following: (a) the studies investigated the access of migrants to health services, the use of health services by migrants and the barriers encountered by migrants in using health services. (b) migrants self-assessed access, use and barriers. (c) studies were conducted in European countries. (d) studies included adult migrants. (e) the language of articles was English

Studies that included in the systematic literature review are presented in Table 1, while the flowchart is presented in Figure 1.

## Results

Sixty-five studies were met our inclusion criteria. Countries that studies were conducted in our review were Spain, Italy, United Kingdom, Greece, Austria, Belgium, France, Netherlands, Wales, Portugal, Germany, Denmark, Switzerland, Norway, Sweden and Czech Republic.

Among studies, 89.2% were quantitative and 11.8% were qualitative. All quantitative studies were cross-sectional. In qualitative studies, the minimum sample size was 10 and the maximum number was 55, while in the quantitative studies, the minimum sample size was 74 and the maximum number was 3,739,244.

For data collection, 58.5% of studies used questionnaires and 30.8% used historical files. Also, personal interviews were performed in 9.2% of studies and focus groups in 1.5% of studies.

Natives were also included in 73.8% of studies allowing comparisons with migrants. In these studies, 73.8% of natives stated that they had better access to health services and used health services better than migrants, while 26.2% found that migrants stated that they had better access to health services and used health services better.

Among studies, 18.5% investigated migrants' access to health services in general, while 81.5% investigated access to specific health services, such as primary health care services, general practitioner, emergency department, hospitalization, etc.

The barriers faced by migrants in accessing and using health services are shown in Table 2. The most common barriers were the following: inability to understand the language and communicate, lack of insurance, lack of information and knowledge, lack of family support, low educational level, short duration of stay in the country of migration, low income, lack of a family doctor and high costs.

The barriers that migrants face in accessing and using health services can be summarized in the following five broad categories: social and economic barriers, health system-related barriers, cultural barriers, knowledge-related barriers and personal barriers.

Social barriers included low educational attainment, lack of insurance, high costs, low income, frequent travel, limited social integration and inability to understand language and communication.

Barriers related to the health system included lack of a family doctor, limited understanding of doctors' instructions, long waiting time, difficulties in access, lack of translators and living in rural areas.

Cultural barriers included stigma, shame and modesty on the part of females and religious beliefs.

Knowledge-related barriers included lack of knowledge about how to access and navigate the health system, lack of knowledge about screening, perception that screening is unnecessary and self-perception of good health status.

Personal barriers include lack of family support, short length of stay in the country of migration, fear, lack of time, anxiety, lack of confidence and functional incapacity.

## Discussion

According to our review, migrants face several barriers both in accessing and using health services.

Firstly, there are significant social and economic barriers that limit migrants' access to health services, as well as their use. More specifically, low social and economic level, as well as living in areas characterized by low income, is a determining factor that reduces the use of health services by migrants, especially those services related to screening, such as in the case of mammography (Ahmad et al., 2012; Donnelly et al., 2009). In many cases, migrants with low social and economic status are paid an hourly rate, resulting in the use of health services leading to lost time and thus reduced income (Donnelly et al., 2009; Meana et al., 2001). This is supported by the fact that moving to health services requires some costs. A typical example is women with a low level of education and limited social integration, who make very little use of screening services (Donnelly et al., 2009; Meana et al., 2001). It is noted that low educational and economic level also leads to a lack of knowledge and understanding which further limits the use of health services by migrants. It is clear that the high cost of some services acts as a deterrent to their use by migrants, as they are unable to cover it (Lobb et al., 2013).

Inability to understand the language is an extremely important barrier faced by migrants, as it leads to inability to communicate, frustration and ultimately abandonment of efforts to use health services (Ahmad et al., 2012; Sun et al., 2010; Todd et al., 2011; Woloshin et al., 1997). Language difficulties reduce the ability of migrants to communicate with healthcare staff and understand their instructions. In addition, the ability of migrants to inform themselves and increase their knowledge, such as the ability to browse websites related to health services or screening, is also significantly limited. Unfortunately, an important obstacle related to the health care system also contributes to this, which is the lack of translators who could improve the quality of communication between migrants and medical staff.

The lack of a family doctor is another important barrier related to the health system, especially in the case of screening, such as in the case of mammography (Ahmad et al., 2012; Meana et al., 2001; Steven et al., 2004; Sun et al., 2010; Todd et al., 2011; Vahabi et al., 2016). Moreover, in some cases, the increased workload of doctors does not allow them to spend more time with migrants to explain more to them and answer their questions and queries especially in the case of screening. In fact, the lack of translators further exacerbates this problem, as doctors are unable to communicate with migrants, with the result that doctors' instructions and recommendations are not understood by migrants.

Particular reference needs to be made to the cultural barriers that migrants face in using health services. A typical example is the case of migrant women with particular religious beliefs. In this case, the existence of male doctors is a particular inhibiting factor for the use of health services related to sensitive issues, such as mammography (Ahmad et al., 2012; Steven et al., 2004; Todd et al., 2011; Vahabi et al., 2016). Some religions recognize women's bodies as 'sacred' and 'private', with the result that women may feel shame and guilt when a male doctor has to look at their bodies in the case of, for example, mammography. Many women, moreover, believe that the occurrence of a disease is God's will or the result of fate, so they do not use screening methods as they consider them unnecessary. In even more extreme situations, some societies consider breast cancer to be the result of immorality, so they view mammography negatively. The problem is further exacerbated by the fact that in some cases medical staff avoid discussing sensitive issues with migrants, in order to respect their cultural sensitivity and avoid possible friction and misunderstandings. This problem is extremely important, as in many cases the recommendation from health professionals is the most important motivation for migrants to undergo screening (Hanson et al., 2009). It is a fact that in most countries not much attention is paid to the cultural and religious specificities of migrants, which, especially in the case of the use of health services, are a decisive factor (Lobb et al., 2013).

Lack of knowledge is a key barrier to the use of health services by migrants, particularly in the case of screening. For example, migrant women are largely unaware of the risk factors for breast cancer (Ahmad et al., 2012; Meana et al., 2001; Vahabi et al.,

2016). It is common, moreover, for migrant women to seek medical help only if they develop symptoms and signs, as health systems in their countries mainly emphasize treatment rather than prevention (Lobb et al., 2013). Similarly, many migrant women have limited knowledge about the benefits, side effects and the internetAsia of mammography and other screening methods. Thus, the lack of knowledge leads migrants to not use screening services as they consider them unnecessary (Hyman et al., 2001). The problem is magnified in the case of migrants who self-assess their health status as good, so that they consider that screening is not necessary (Garcia-Subirats et al., 2014; Jiménez-Rubio & Hernández-Quevedo, 2011). Moreover, the lack of knowledge about how to access and navigate the health system creates even more problems, as migrants do not even know how to access the different services. It should be noted that the lack of knowledge is often combined with a lack of understanding of the language and a lack of translators in health services (Lobb et al., 2013).

Many migrants do not undergo screening because they are concerned about the consequences of being diagnosed with cancer, such as stress, access to necessary services, social isolation, poor prognosis, etc. (Ahmad et al., 2012; Vahabi et al., 2016). In addition, due to lack of knowledge, migrants are also concerned about the adverse effects of different tests, such as exposure to radiation during a mammogram, adverse effects of a therapeutic intervention (e.g. surgical removal of a tumor), etc. (Ahmad et al., 2012).

In conclusion, intensive efforts are needed to increase migrants' knowledge, implement culturally sensitive interventions in migrant communities and better inform health professionals so that they can reach migrants more effectively. Migrants are now a significant part of the population in host countries and appropriate conditions should be created for their best possible adaptation in order to safeguard and promote both migrant and public health.



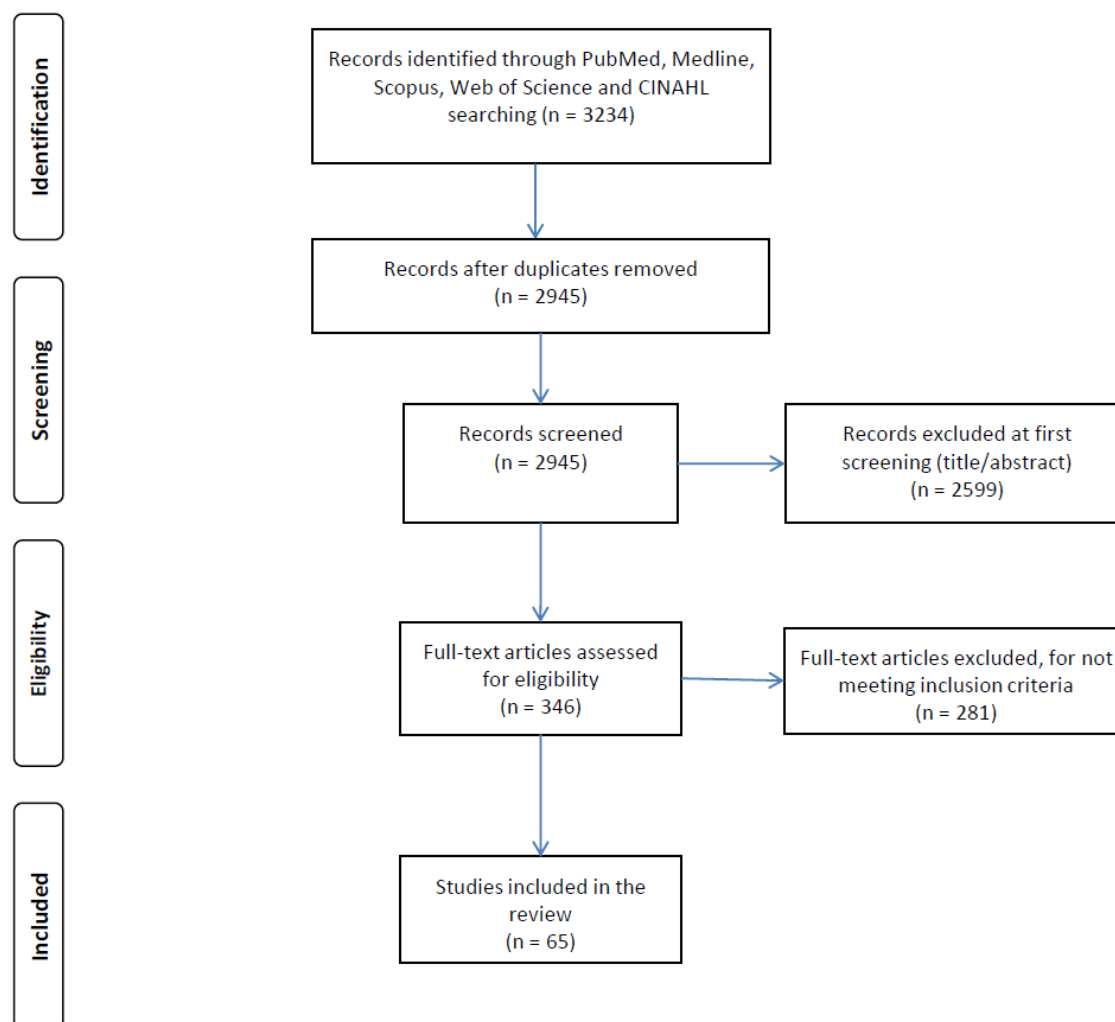

**Figure 1.** Flowchart of the systematic review.

**Table 1.** Studies on migrants' access to health services, use of health services and the relative barriers.

| Reference                      | Country        | Study year | Study design    | Participants (n) | Continent/country of migrants                                  | Data collection tools       | Comparison with natives | Access and use of healthcare services                                                 | Barriers |
|--------------------------------|----------------|------------|-----------------|------------------|----------------------------------------------------------------|-----------------------------|-------------------------|---------------------------------------------------------------------------------------|----------|
| (X. Liu et al., 2017)          | United Kingdom | 2017       | Qualitative     | 54               | China                                                          | Focus groups and interviews |                         | ↓                                                                                     | ↑        |
| (Ellins & Glasby, 2016)        | United Kingdom | 2012       | Qualitative     | 20               | Asia                                                           | Interviews                  |                         | ↓                                                                                     | ↑        |
| (Suurmond et al., 2016)        | Netherlands    | 2012       | Qualitative     | 55               | Turkey, Morocco, Surinam                                       | Interviews                  |                         | ↓                                                                                     | ↑        |
| (Saltus & Pithara, 2015)       | Wales          | 2013       | Qualitative     | 32               | Asia                                                           | Interviews                  |                         | ↓                                                                                     | ↑        |
| (Thyli et al., 2014)           | Norway         | 2009       | Qualitative     | 15               | Iran, Iraq, Bosnia-Herzegovina, Vietnam                        | Interviews                  |                         | ↓                                                                                     | ↑        |
| (Z. Liu et al., 2015)          | United Kingdom | 2015       | Qualitative     | 33               | China                                                          | Interviews                  |                         | ↓                                                                                     | ↑        |
| (Doshani et al., 2007)         | United Kingdom | 2007       | Qualitative     | 24               | Asia                                                           | Focus groups                |                         | ↓                                                                                     | ↑        |
| (Nielsen et al., 2012)         | Denmark        | 2007       | Cross-sectional | 4,952            | Serbia, Croatia, Iran, Iraq, Lebanon, Pakistan, Somali, Turkey | Questionnaire               | X                       | ↑ family physician<br>↑ hospitalization<br>↑ outpatients clinics<br>↑ ER<br>↓ dentist |          |
| (Buja et al., 2014)            | Italy          | 2013       | Cross-sectional | 35,541           | Europe, Asia, Africa, Latin America, Oceania                   | Questionnaire               | X                       | ↑ ER                                                                                  |          |
| (Berens et al., 2014)          | Germany        | 2010-2011  | Cross-sectional | 208,500          | Turkey                                                         | Files                       | X                       | ↑ screening                                                                           |          |
| (Garcia-Subirats et al., 2014) | Spain          | 2006-2012  | Cross-sectional | 31,063           | Europe, Asia, Africa, Latin America                            | Questionnaire               | X                       | ↑ family physician                                                                    |          |
| (Ricardo-Rodrigues et al.,     | Spain          | 2011       | Cross-sectional | 5,303            |                                                                | Questionnaire               | X                       | ↓ screening                                                                           |          |

|                                              |                                                                                                                               |           |                 |           |                                                 |               |   |                                                                          |  |
|----------------------------------------------|-------------------------------------------------------------------------------------------------------------------------------|-----------|-----------------|-----------|-------------------------------------------------|---------------|---|--------------------------------------------------------------------------|--|
| 2015)                                        |                                                                                                                               |           |                 |           |                                                 |               |   |                                                                          |  |
| (Solé-Auró et al., 2012)                     | Austria,<br>Belgium,<br>Denmark,<br>France,<br>Germany,<br>Greece, Italy,<br>Netherlands,<br>Spain,<br>Sweden,<br>Switzerland | 2004      | Cross-sectional | 27,395    | Europe, Asia, Africa,<br>Latin America          | Questionnaire | X | ↑ family physician                                                       |  |
| (Glaesmer et al., 2011)                      | Germany                                                                                                                       | 2011      | Cross-sectional | 2,510     | Europe, former Soviet<br>Union, Turkey          | Questionnaire | X | ↑ family physician<br>↑ hospitalization<br>↓ outpatients clinics         |  |
| (Muñoz et al., 2012)                         | Spain                                                                                                                         | 2008      | Cross-sectional | 63,257    | Europe, Asia, Africa,<br>Latin America          | Files         | X | ↑ family physician<br>↑ outpatients clinics                              |  |
| (Martín-López et al., 2013)                  | Spain                                                                                                                         | 2009      | Cross-sectional | 5,771     |                                                 | Questionnaire | X | ↓ screening                                                              |  |
| (Díaz et al., 2014)                          | Norway                                                                                                                        | 2008      | Cross-sectional | 2,977,933 |                                                 | Files         | X | ↑ family physician                                                       |  |
| (Denktaş et al., 2009)                       | Netherlands                                                                                                                   | 2003      | Cross-sectional | 1503      | Turkey, Morocco,<br>Surinam                     | Questionnaire | X | ↑ family physician                                                       |  |
| (Hernández-Quevedo &<br>Jiménez-Rubio, 2009) | Spain                                                                                                                         | 2003-2006 | Cross-sectional | 51,086    | Europe, Asia, Africa,<br>Latin America, Oceania | Questionnaire | X | ↑ hospitalization<br>↑ ER<br>↓ outpatients clinics<br>↓ family physician |  |
| (Malmusi et al., 2014)                       | Czech<br>Republic                                                                                                             | 2008      | Cross-sectional | 1,955     | Ukraine                                         | Questionnaire | X | ↓ outpatients clinics<br>↓ family physician<br>↓ ER                      |  |

|                                                      |             |           |                 |           |                                                 |               |   |                                                     |  |
|------------------------------------------------------|-------------|-----------|-----------------|-----------|-------------------------------------------------|---------------|---|-----------------------------------------------------|--|
|                                                      |             |           |                 |           |                                                 |               |   | ↓ dentist                                           |  |
| <b>(Jiménez-Rubio &amp; Hernández-Quevedo, 2011)</b> | Spain       | 2003-2006 | Cross-sectional | 51,086    | Europe, Asia, Africa, Latin America, Oceania    | Questionnaire | X | ↑ ER<br>↓ family physician<br>↓ outpatients clinics |  |
| <b>(Diaz &amp; Kumar, 2014)</b>                      | Norway      | 2008      | Cross-sectional | 1,605,873 |                                                 | Files         | X | ↓ family physician                                  |  |
| <b>(de Back et al., 2015)</b>                        | Netherlands | 2009-2010 | Cross-sectional | 58,274    | Antilles                                        | Files         | X | ↓ family physician                                  |  |
| <b>(Gimeno-Feliu et al., 2013)</b>                   | Spain       | 2007      | Cross-sectional | 594,145   | Europe, Asia, Africa, Latin America, Oceania    | Files         | X | ↓ family physician                                  |  |
| <b>(Sanz et al., 2011)</b>                           | Spain       | 2006      | Cross-sectional | 13,305    | Europe, Asia, Africa, Latin America, Oceania    | Questionnaire | X | ↓ outpatients clinics<br>↓ ER                       |  |
| <b>(De Luca et al., 2013)</b>                        | Italy       | 2004-2005 | Cross-sectional | 102,857   | Europe, Asia, Africa, Latin America             | Questionnaire | X | ↑ ER<br>↓ outpatients clinics                       |  |
| <b>(Rinaldi et al., 2016)</b>                        | Italy       | 2011-2014 | Cross-sectional | 45,645    | Asia, Africa, Ukraine, Moldova, Servia, Albania | Files         | X | ↑ hospitalization                                   |  |
| <b>(de Bruijne et al., 2013)</b>                     | Netherlands | 1995-2005 | Cross-sectional | 433,501   | Morocco, Turkey, Surinam, Antilles              | Files         | X | ↑ hospitalization                                   |  |
| <b>(Ramos et al., 2013)</b>                          | Spain       | 2011      | Cross-sectional | 42,839    | Europe, Asia, Africa, Latin America             | Files         | X | ↓ hospitalization                                   |  |
| <b>(Neergaard et al., 2013)</b>                      | Denmark     | 2006      | Cross-sectional | 599       | Europe                                          | Files         | X | ↑ outpatients clinics                               |  |
| <b>(Ruud et al., 2015)</b>                           | Norway      | 2009      | Cross-sectional | 3,864     | Sweden, Pakistan, Somali, Poland                | Questionnaire | X | ↑ ER                                                |  |
| <b>(Carrasco-Garrido et al., 2009)</b>               | Spain       | 2006      | Cross-sectional | 28,042    | Europe, Asia, Africa, Latin America             | Questionnaire | X | ↑ ER                                                |  |
| <b>(Sandvik et al., 2012)</b>                        | Norway      | 2008      | Cross-sectional | 715,278   | Poland, Germany, Iraq, Somali                   | Files         | X | ↓ ER                                                |  |
| <b>(Jensen et al., 2012)</b>                         | Denmark     | 2008-2009 | Cross-sectional | 149,234   | Europe, Asia, Africa,                           | Files         | X | ↓ screening                                         |  |

|                                        |             |           |                 |           |                                     |               |   |                       |   |
|----------------------------------------|-------------|-----------|-----------------|-----------|-------------------------------------|---------------|---|-----------------------|---|
|                                        |             |           |                 |           | Latin America                       |               |   |                       |   |
| <b>(Carrasco-Garrido et al., 2014)</b> | Spain       | 2012      | Cross-sectional | 7,938     |                                     | Questionnaire | X | ↓ screening           |   |
| <b>(Linne et al., 2014)</b>            | Sweden      | 2010-2012 | Cross-sectional | 18,876    | Europe, Asia, Africa, Latin America | Questionnaire | X | ↓ screening           |   |
| <b>(Azerkan et al., 2012)</b>          | Sweden      | 1993-2005 | Cross-sectional | 2,176,255 | Europe, Asia, Africa, Latin America | Files         | X | ↓ screening           |   |
| <b>(Kristiansen et al., 2012)</b>      | Denmark     | 1991-2008 | Cross-sectional | 89,973    | Europe, Asia, Africa, Latin America | Files         | X | ↓ screening           |   |
| <b>(Simou et al., 2011)</b>            | Greece      | 2004-2009 | Cross-sectional | 9,682     | Albania , Bulgaria                  | Questionnaire | X | ↓ screening           |   |
| <b>(Pons-Vigués et al., 2011)</b>      | Spain       | 2006      | Cross-sectional | 16,767    | Europe, Asia, Africa, Latin America | Questionnaire | X | ↓ screening           |   |
| <b>(Frederiksen et al., 2010)</b>      | Denmark     | 2005-2006 | Cross-sectional | 85,374    | Europe, Asia, Africa, Latin America | Questionnaire | X | ↓ screening           |   |
| <b>(S. F. Dias et al., 2008)</b>       | Portugal    | 2008      | Cross-sectional | 1513      | Asia, Africa                        | Questionnaire |   | ↓ PR                  |   |
| <b>(S. Dias et al., 2011)</b>          | Portugal    | 2011      | Cross-sectional | 1375      | Asia, Africa                        | Questionnaire |   | ↓ PR                  |   |
| <b>(Ehmsen et al., 2014)</b>           | Denmark     | 2011-2013 | Cross-sectional | 830       | Europe, Asia, Africa                | Questionnaire |   | ↓ PR                  |   |
| <b>(Brindicci et al., 2015)</b>        | Italy       | 2009-2010 | Cross-sectional | 272       | Asia, Africa                        | Questionnaire |   | ↓ PR                  |   |
| <b>(Teunissen et al., 2014)</b>        | Netherlands | 2014      | Cross-sectional | 541       | Asia, Africa                        | Questionnaire |   | ↓ PR                  |   |
| <b>(de Jonge et al., 2011)</b>         | Netherlands | 2010      | Cross-sectional | 1141      | Asia, Africa                        | Questionnaire |   | ↓ outpatients clinics |   |
| <b>(Biswas et al., 2011)</b>           | Denmark     | 2011      | Qualitative     | 10        | Asia                                | Interviews    |   | ↓ ER                  |   |
| <b>(Almeida et al., 2014)</b>          | Portugal    | 2012      | Cross-sectional | 277       | Africa                              | Questionnaire | X | ↓ PR                  | ↑ |
| <b>(Diaz et al., 2015)</b>             | Norway      | 2008      | Cross-sectional | 3,739,244 | Europe, Asia, Africa                | Files         | X | ↑ ER<br>↓ PR          | ↑ |
| <b>(Esscher et al., 2014)</b>          | Sweden      | 2010      | Cross-sectional | 74        | Europe, Asia, Africa                | Files         | X | ↓ PR                  | ↑ |
| <b>(Franchi et al., 2016)</b>          | Italy       | 2010      | Cross-sectional | 51,016    | Europe, Asia, Africa                | Files         | X | ↑ hospitalization     | ↑ |
| <b>(Klaufus et al., 2014)</b>          | Netherlands | 2008      | Cross-sectional | 14,131    | Europe, Asia, Africa                | Questionnaire | X | ↓ PR<br>↑ PR          |   |

|                                   |             |           |                 |           |                                           |               |   |                           |   |
|-----------------------------------|-------------|-----------|-----------------|-----------|-------------------------------------------|---------------|---|---------------------------|---|
| (Koopmans et al., 2013)           | Netherlands | 2001-2003 | Cross-sectional | 9,077     | Europe, Asia, Africa                      | Questionnaire | X | ↓ PR                      | ↑ |
| (Nielsen et al., 2015)            | Sweden      | 2007      | Cross-sectional | 3,573     | Europe, Asia, Africa                      | Questionnaire | X | ↓ PR                      | ↑ |
| (Spinogatti et al., 2015)         | Italy       | 2001-2010 | Cross-sectional | 139,775   | Europe, Asia, Africa                      | Files         | X | ↑ ER<br>↓ PR              | ↑ |
| (Straiton et al., 2014)           | Norway      | 2008      | Cross-sectional | 2,712,974 | Europe, Asia, Africa                      | Files         | X | ↓ ER<br>↓ PR              | ↑ |
| (Villarrol & Artazcoz, 2016)      | Spain       | 20        | Cross-sectional | 22,234    | Europe, Asia, Africa                      | Questionnaire | X | ↓ PR                      | ↑ |
| (Galanis et al., 2013)            | Greece      | 2012      | Cross-sectional | 191       | Asia, Africa, former Soviet Union, Balkan | Questionnaire |   | ↓                         | ↑ |
| (Sourtzi et al., 2020)            | Greece      | 2013-2014 | Cross-sectional | 1152      | Asia, Africa, former Soviet Union, Balkan | Questionnaire |   | ↓ PR                      | ↑ |
| (Tsitsakis et al., 2017)          | Greece      | 2005-2011 | Cross-sectional | 14,034    | Asia, Africa, former Soviet Union, Balkan | Files         | X | ↑ ER<br>↓ hospitalization | ↑ |
| (Kaitelidou et al., 2020)         | Greece      | 2013-2014 | Cross-sectional | 1854      | Asia, Africa, former Soviet Union, Balkan | Questionnaire | X | ↓                         | ↑ |
| (Stathopoulou et al., 2018)       | Greece      | 2016      | Cross-sectional | 1006      | Albania (mainly)                          | Questionnaire | X | ↓                         | ↑ |
| (Chantzaras & Yfantopoulos, 2018) | Greece      | 2016      | Cross-sectional | 1332      | Albania (mainly)                          | Questionnaire | X | ↓                         | ↑ |
| (Boutziona et al., 2020)          | Greece      | 2014      | Cross-sectional | 167       |                                           | Questionnaire |   | ↓                         | ↑ |

PR: primary healthcare

ER: emergency department

**Table 2.** Detailed description of the barriers encountered by migrants in accessing and using healthcare services.

| Reference                      | Language and communication difficulties | Lack of information and knowledge | Family support failure | Cultural and religion issues | Fear for pain | Difficulties to understand physicians' guidelines |
|--------------------------------|-----------------------------------------|-----------------------------------|------------------------|------------------------------|---------------|---------------------------------------------------|
| (X. Liu et al., 2017)          | X                                       | X                                 | X                      | X                            |               |                                                   |
| (Galanis et al., 2013)         | X                                       |                                   |                        |                              |               |                                                   |
| (Boutziona et al., 2020)       | X                                       |                                   |                        | X                            |               |                                                   |
| (Koopmans et al., 2013)        | X                                       |                                   | X                      |                              |               |                                                   |
| (Nielsen et al., 2015)         | X                                       |                                   | X                      |                              |               |                                                   |
| (Spinogatti et al., 2015)      |                                         |                                   | X                      |                              |               |                                                   |
| (Straiton et al., 2014)        |                                         |                                   | X                      |                              |               |                                                   |
| (Villarroel & Artazcoz, 2016)  |                                         |                                   | X                      |                              |               |                                                   |
| (Beiser & Hou, 2014)           | X                                       |                                   | X                      |                              |               |                                                   |
| (Diaz et al., 2015)            |                                         |                                   | X                      |                              |               |                                                   |
| (Durbin et al., 2014)          | X                                       |                                   |                        |                              |               |                                                   |
| (Esscher et al., 2014)         | X                                       |                                   |                        |                              |               |                                                   |
| (Klaufus et al., 2014)         |                                         |                                   | X                      |                              |               |                                                   |
| (Almeida et al., 2014)         |                                         |                                   | X                      |                              |               |                                                   |
| (Ho et al., 2005)              |                                         |                                   | X                      |                              |               |                                                   |
| (Ellins & Glasby, 2016)        | X                                       | X                                 |                        |                              |               |                                                   |
| (Suurmond et al., 2016)        | X                                       | X                                 | X                      |                              |               |                                                   |
| (Thyli et al., 2014)           | X                                       |                                   | X                      |                              | X             |                                                   |
| (Z. Liu et al., 2015)          | X                                       |                                   |                        |                              |               | X                                                 |
| (Doshani et al., 2007)         |                                         | X                                 |                        |                              |               |                                                   |
| (Garcia-Subirats et al., 2014) |                                         |                                   |                        |                              | X             |                                                   |
| (Denktaş et al., 2009)         | X                                       |                                   |                        |                              |               |                                                   |

**Table 2 (continued).** Detailed description of the barriers encountered by migrants in accessing and using healthcare services.

| Παραπομπή                                 | Females shame and modesty | Long waiting hour | Lack of time | High cost | Lack of insurance | Emotional barriers | Functional disability |
|-------------------------------------------|---------------------------|-------------------|--------------|-----------|-------------------|--------------------|-----------------------|
| (Galanis et al., 2013)                    |                           | X                 |              | X         |                   | X                  |                       |
| (Boutziona et al., 2020)                  |                           |                   |              | X         | X                 |                    |                       |
| (Almeida et al., 2014)                    |                           |                   |              |           | X                 |                    |                       |
| (Doshani et al., 2007)                    | X                         |                   |              |           | X                 |                    |                       |
| (Garcia-Subirats et al., 2014)            |                           | X                 | X            | X         | X                 |                    |                       |
| (Denktaş et al., 2009)                    |                           |                   |              |           | X                 |                    |                       |
| (X. Liu et al., 2017)                     |                           | X                 |              |           | X                 |                    |                       |
| (Sourtzi et al., 2020)                    | X                         |                   |              |           | X                 |                    |                       |
| (Boutziona et al., 2020)                  | X                         |                   |              |           | X                 |                    |                       |
| (Esscher et al., 2014)                    | X                         |                   |              |           | X                 |                    |                       |
| (Klaufus et al., 2014)                    | X                         |                   |              |           |                   |                    | X                     |
| (Nielsen et al., 2015)                    | X                         |                   |              |           |                   |                    | X                     |
| (Spinogatti et al., 2015)                 | X                         |                   |              |           |                   |                    |                       |
| (Villarroel & Artazcoz, 2016)             | X                         |                   |              |           |                   |                    |                       |
| (Jiménez-Rubio & Hernández-Quevedo, 2011) | X                         |                   |              |           |                   |                    |                       |
| (Garcia-Subirats et al., 2014)            | X                         |                   |              |           |                   |                    |                       |
| (Suurmond et al., 2016)                   |                           |                   | X            |           |                   |                    |                       |
| (Denktaş et al., 2009)                    |                           |                   | X            |           |                   |                    |                       |



**Table 2 (continued).** Detailed description of the barriers encountered by migrants in accessing and using healthcare services.

| Παραπομπή                                 | Short length of stay | Low income | Stay in rural areas | Low educational level | Limited social integration | Lack of trust | Self-esteem of good health status |
|-------------------------------------------|----------------------|------------|---------------------|-----------------------|----------------------------|---------------|-----------------------------------|
| (Saltus & Pithara, 2015)                  |                      |            |                     |                       | X                          |               |                                   |
| (Spinogatti et al., 2015)                 |                      |            |                     | X                     |                            |               |                                   |
| (Straiton et al., 2014)                   | X                    | X          |                     |                       |                            |               |                                   |
| (Villarroel & Artazcoz, 2016)             |                      |            |                     | X                     |                            |               |                                   |
| (Sourtzi et al., 2020)                    |                      | X          |                     |                       |                            |               |                                   |
| (Beiser & Hou, 2014)                      | X                    |            |                     |                       |                            |               |                                   |
| (Diaz et al., 2015)                       |                      | X          | X                   | X                     |                            |               |                                   |
| (Durbin et al., 2014)                     |                      | X          |                     | X                     |                            |               |                                   |
| (Esscher et al., 2014)                    |                      | X          |                     | X                     |                            |               |                                   |
| (Klaufus et al., 2014)                    |                      | X          |                     | X                     | X                          |               |                                   |
| (Koopmans et al., 2013)                   |                      |            |                     | X                     |                            |               |                                   |
| (Nielsen et al., 2015)                    | X                    | X          |                     |                       |                            |               |                                   |
| (Almeida et al., 2014)                    |                      | X          |                     | X                     |                            |               |                                   |
| (Ricardo-Rodrigues et al., 2015)          |                      |            | X                   | X                     |                            |               |                                   |
| (Solé-Auró et al., 2012)                  |                      |            |                     |                       |                            |               |                                   |
| (Diaz et al., 2014)                       | X                    | X          |                     |                       |                            |               |                                   |
| (Jiménez-Rubio & Hernández-Quevedo, 2011) |                      | X          |                     |                       |                            |               |                                   |
| (Diaz & Kumar, 2014)                      | X                    |            |                     |                       |                            |               |                                   |
| (Kristiansen et al., 2012)                |                      |            |                     | X                     |                            |               |                                   |
| (Pons-Vigués et al., 2011)                |                      | X          |                     |                       |                            |               |                                   |
| (Jiménez-Rubio & Hernández-Quevedo, 2011) |                      |            |                     |                       |                            |               | X                                 |
| (Garcia-Subirats et al., 2014)            |                      |            |                     |                       |                            |               | X                                 |
| (Thyli et al., 2014)                      |                      |            |                     |                       |                            | X             |                                   |

## References

- Abe-Kim, J., Takeuchi, D. T., Hong, S., Zane, N., Sue, S., Spencer, M. S., Appel, H., Nicdao, E., & Alegría, M. (2007). Use of mental health-related services among immigrant and US-born Asian Americans: Results from the National Latino and Asian American Study. *American Journal of Public Health*, 97(1), 91–98. <https://doi.org/10.2105/AJPH.2006.098541>
- Ahmad, F., Mahmood, S., Pietkiewicz, I., McDonald, L., & Ginsburg, O. (2012). Concept mapping with South Asian immigrant women: Barriers to mammography and solutions. *Journal of Immigrant and Minority Health*, 14(2), 242–250. <https://doi.org/10.1007/s10903-011-9472-7>
- Alegría, M., Cao, Z., McGuire, T. G., Ojeda, V. D., Sribney, B., Woo, M., & Takeuchi, D. (2006). Health insurance coverage for vulnerable populations: Contrasting Asian Americans and Latinos in the United States. *Inquiry: A Journal of Medical Care Organization, Provision and Financing*, 43(3), 231–254. [https://doi.org/10.5034/inquiryjrn1\\_43.3.231](https://doi.org/10.5034/inquiryjrn1_43.3.231)
- Almeida, L. M., Santos, C. C., Caldas, J. P., Ayres-de-Campos, D., & Dias, S. (2014). Obstetric care in a migrant population with free access to health care. *International Journal of Gynaecology and Obstetrics: The Official Organ of the International Federation of Gynaecology and Obstetrics*, 126(3), 244–247. <https://doi.org/10.1016/j.ijgo.2014.03.023>
- Azerkan, F., Sparén, P., Sandin, S., Tillgren, P., Faxelid, E., & Zendejdel, K. (2012). Cervical screening participation and risk among Swedish-born and immigrant women in Sweden. *International Journal of Cancer*, 130(4), 937–947. <https://doi.org/10.1002/ijc.26084>
- Beiser, M., & Hou, F. (2014). Chronic health conditions, labour market participation and resource consumption among immigrant and native-born residents of Canada. *International Journal of Public Health*, 59(3), 541–547. <https://doi.org/10.1007/s00038-014-0544-z>
- Berens, E.-M., Stahl, L., Yilmaz-Aslan, Y., Sauzet, O., Spallek, J., & Razum, O. (2014). Participation in breast cancer screening among women of Turkish origin in

- Germany – a register-based study. *BMC Women's Health*, 14(1), 24. <https://doi.org/10.1186/1472-6874-14-24>
- Biswas, D., Kristiansen, M., Krasnik, A., & Norredam, M. (2011). Access to healthcare and alternative health-seeking strategies among undocumented migrants in Denmark. *BMC Public Health*, 11, 560. <https://doi.org/10.1186/1471-2458-11-560>
- Boutziona, I., Papanikolaou, D., Sokolakis, I., Mytilekas, K. V., & Apostolidis, A. (2020). Healthcare Access, Quality, and Satisfaction Among Albanian Immigrants Using the Emergency Department in Northern Greece. *Journal of Immigrant and Minority Health*, 22(3), 512–525. <https://doi.org/10.1007/s10903-020-00983-x>
- Brindicci, G., Trillo, G., Santoro, C. R., Volpe, A., Monno, L., & Angarano, G. (2015). Access to health services for undocumented immigrants in Apulia. *Journal of Immigrant and Minority Health*, 17(2), 618–623. <https://doi.org/10.1007/s10903-014-0009-8>
- Buja, A., Fusco, M., Furlan, P., Bertoncetto, C., Baldovin, T., Casale, P., Marcolongo, A., & Baldo, V. (2014). Characteristics, processes, management and outcome of accesses to accident and emergency departments by citizenship. *International Journal of Public Health*, 59(1), 167–174. <https://doi.org/10.1007/s00038-013-0483-0>
- Callahan, S. T., Hickson, G. B., & Cooper, W. O. (2006). Health care access of Hispanic young adults in the United States. *The Journal of Adolescent Health: Official Publication of the Society for Adolescent Medicine*, 39(5), 627–633. <https://doi.org/10.1016/j.jadohealth.2006.04.012>
- Carrasco-Garrido, P., Hernandez-Barrera, V., Lopez de Andres, A., Jimenez-Trujillo, I., Gallardo Pino, C., & Jimenez-Garcia, R. (2014). Awareness and uptake of colorectal, breast, cervical and prostate cancer screening tests in Spain. *European Journal of Public Health*, 24(2), 264–270. <https://doi.org/10.1093/eurpub/ckt089>
- Carrasco-Garrido, P., Jiménez-García, R., Barrera, V. H., de Andrés, A. L., & de Miguel, A. G. (2009). Significant differences in the use of healthcare resources of native-born and foreign born in Spain. *BMC Public Health*, 9, 201. <https://doi.org/10.1186/1471-2458-9-201>

- Chantzaras, A. E., & Yfantopoulos, J. N. (2018). Income-related health inequalities among the migrant and native-born populations in Greece during the economic crisis: A decomposition analysis. *European Journal of Public Health*, 28(suppl\_5), 24–31. <https://doi.org/10.1093/eurpub/cky203>
- Cunningham, P. J. (2006). What accounts for differences in the use of hospital emergency departments across U.S. communities? *Health Affairs (Project Hope)*, 25(5), w324-336. <https://doi.org/10.1377/hlthaff.25.w324>
- de Back, T. R., Bodewes, A. J., Brewster, L. M., & Kunst, A. E. (2015). Cardiovascular Health and Related Health Care Use of Moluccan-Dutch Immigrants. *PloS One*, 10(9), e0138644. <https://doi.org/10.1371/journal.pone.0138644>
- de Bruijne, M. C., van Rosse, F., Uiters, E., Droomers, M., Suurmond, J., Stronks, K., & Essink-Bot, M.-L. (2013). Ethnic variations in unplanned readmissions and excess length of hospital stay: A nationwide record-linked cohort study. *European Journal of Public Health*, 23(6), 964–971. <https://doi.org/10.1093/eurpub/ckt005>
- de Jonge, A., Rijnders, M., Agyemang, C., van der Stouwe, R., den Otter, J., Van den Muijsenbergh, M. E. T. C., & Buitendijk, S. (2011). Limited midwifery care for undocumented women in the Netherlands. *Journal of Psychosomatic Obstetrics and Gynaecology*, 32(4), 182–188. <https://doi.org/10.3109/0167482X.2011.589016>
- De Luca, G., Ponzo, M., & Andrés, A. R. (2013). Health care utilization by immigrants in Italy. *International Journal of Health Care Finance and Economics*, 13(1), 1–31. <https://doi.org/10.1007/s10754-012-9119-9>
- Denktaş, S., Koopmans, G., Birnie, E., Foets, M., & Bonsel, G. (2009). Ethnic background and differences in health care use: A national cross-sectional study of native Dutch and immigrant elderly in the Netherlands. *International Journal for Equity in Health*, 8(1), 35. <https://doi.org/10.1186/1475-9276-8-35>
- Deroose, K. P., Bahney, B. W., Lurie, N., & Escarce, J. J. (2009). Review: Immigrants and health care access, quality, and cost. *Medical Care Research and Review: MCRR*, 66(4), 355–408. <https://doi.org/10.1177/1077558708330425>

- Dias, S. F., Severo, M., & Barros, H. (2008). Determinants of health care utilization by immigrants in Portugal. *BMC Health Services Research*, 8(1), 207. <https://doi.org/10.1186/1472-6963-8-207>
- Dias, S., Gama, A., Cortes, M., & de Sousa, B. (2011). Healthcare-seeking patterns among immigrants in Portugal. *Health & Social Care in the Community*, 19(5), 514–521. <https://doi.org/10.1111/j.1365-2524.2011.00996.x>
- Diaz, E., Calderón-Larrañaga, A., Prado-Torres, A., Poblador-Plou, B., & Gimeno-Feliu, L.-A. (2015). How do immigrants use primary health care services? A register-based study in Norway. *European Journal of Public Health*, 25(1), 72–78. <https://doi.org/10.1093/eurpub/cku123>
- Diaz, E., Gimeno-Feliu, L.-A., Calderón-Larrañaga, A., & Prados-Torres, A. (2014). Frequent attenders in general practice and immigrant status in Norway: A nationwide cross-sectional study. *Scandinavian Journal of Primary Health Care*, 32(4), 232–240. <https://doi.org/10.3109/02813432.2014.982368>
- Diaz, E., & Kumar, B. N. (2014). Differential utilization of primary health care services among older immigrants and Norwegians: A register-based comparative study in Norway. *BMC Health Services Research*, 14, 623. <https://doi.org/10.1186/s12913-014-0623-0>
- Donnelly, T. T., McKellin, W., Hislop, G., & Long, B. (2009). Socioeconomic influences on Vietnamese-Canadian women’s breast and cervical cancer prevention practices: A social determinant’s perspective. *Social Work in Public Health*, 24(5), 454–476. <https://doi.org/10.1080/19371910802678772>
- Doshani, A., Pitchforth, E., Mayne, C. J., & Tincello, D. G. (2007). Culturally sensitive continence care: A qualitative study among South Asian Indian women in Leicester. *Family Practice*, 24(6), 585–593. <https://doi.org/10.1093/fampra/cmm058>
- Durbin, A., Lin, E., Moineddin, R., Steele, L. S., & Glazier, R. H. (2014). Use of mental health care for nonpsychotic conditions by immigrants in different admission classes and by refugees in Ontario, Canada. *Open Medicine: A Peer-Reviewed, Independent, Open-Access Journal*, 8(4), e136-146.

- Ehmsen, B. K., Biswas, D., Jensen, N. K., Krasnik, A., & Norredam, M. (2014). Undocumented migrants have diverse health problems. *Danish Medical Journal*, 61(9), A4897.
- Ellins, J., & Glasby, J. (2016). “You don’t know what you are saying ‘Yes’ and what you are saying ‘No’ to”: Hospital experiences of older people from minority ethnic communities. *Ageing and Society*, 36(1), 42–63. <https://doi.org/10.1017/S0144686X14000919>
- Esscher, A., Binder-Finnema, P., Bødker, B., Högberg, U., Mulic-Lutvica, A., & Essén, B. (2014). Suboptimal care and maternal mortality among foreign-born women in Sweden: Maternal death audit with application of the “migration three delays” model. *BMC Pregnancy and Childbirth*, 14, 141. <https://doi.org/10.1186/1471-2393-14-141>
- Franchi, C., Baviera, M., Sequi, M., Cortesi, L., Tettamanti, M., Roncaglioni, M. C., Pasina, L., Digneffa, C. D., Fortino, I., Bortolotti, A., Merlino, L., Mannucci, P. M., & Nobili, A. (2016). Comparison of Health Care Resource Utilization by Immigrants Versus Native Elderly People. *Journal of Immigrant and Minority Health*, 18(1), 1–7. <https://doi.org/10.1007/s10903-014-0152-2>
- Frederiksen, B. L., Jørgensen, T., Brasso, K., Holten, I., & Osler, M. (2010). Socioeconomic position and participation in colorectal cancer screening. *British Journal of Cancer*, 103(10), 1496–1501. <https://doi.org/10.1038/sj.bjc.6605962>
- Galanis, P., Sourtzi, P., Bellali, T., Theodorou, M., Karamitri, I., Siskou, O., Charalambous, G., & Kaitelidou, D. (2013). Public health services knowledge and utilization among immigrants in Greece: A cross-sectional study. *BMC Health Services Research*, 13, 350. <https://doi.org/10.1186/1472-6963-13-350>
- Garcia-Subirats, I., Vargas, I., Sanz-Barbero, B., Malmusi, D., Ronda, E., Ballesta, M., & Vázquez, M. (2014). Changes in Access to Health Services of the Immigrant and Native-Born Population in Spain in the Context of Economic Crisis. *International Journal of Environmental Research and Public Health*, 11(10), 10182–10201. <https://doi.org/10.3390/ijerph111010182>
- Gimeno-Feliu, L. A., Magallón-Botaya, R., Macipe-Costa, R. M., Luzón-Oliver, L., Cañada-Millan, J. L., & Lasheras-Barrio, M. (2013). Differences in the use of

primary care services between Spanish national and immigrant patients. *Journal of Immigrant and Minority Health*, 15(3), 584–590. <https://doi.org/10.1007/s10903-012-9647-x>

Glaesmer, H., Wittig, U., Braehler, E., Martin, A., Mewes, R., & Rief, W. (2011). Health care utilization among first and second generation immigrants and native-born Germans: A population-based study in Germany. *International Journal of Public Health*, 56(5), 541–548. <https://doi.org/10.1007/s00038-010-0205-9>

Guendelman, S., Schauffler, H. H., & Pearl, M. (2001). Unfriendly shores: How immigrant children fare in the U.S. health system. *Health Affairs (Project Hope)*, 20(1), 257–266. <https://doi.org/10.1377/hlthaff.20.1.257>

Hanson, K., Montgomery, P., Bakker, D., & Conlon, M. (2009). Factors influencing mammography participation in Canada: An integrative review of the literature. *Current Oncology (Toronto, Ont.)*, 16(5), 65–75. <https://doi.org/10.3747/co.v16i5.359>

Hernández-Quevedo, C., & Jiménez-Rubio, D. (2009). A comparison of the health status and health care utilization patterns between foreigners and the national population in Spain: New evidence from the Spanish National Health Survey. *Social Science & Medicine* (1982), 69(3), 370–378. <https://doi.org/10.1016/j.socscimed.2009.05.005>

Ho, V., Yamal, J. M., Atkinson, E. N., Basen-Engquist, K., Tortolero-Luna, G., & Follen, M. (2005). Predictors of breast and cervical screening in Vietnamese women in Harris County, Houston, Texas. *Cancer Nursing*, 28(2), 119–129; quiz 130–131. <https://doi.org/10.1097/00002820-200503000-00005>

Huang, Z. J., Yu, S. M., & Ledsky, R. (2006). Health status and health service access and use among children in U.S. immigrant families. *American Journal of Public Health*, 96(4), 634–640. <https://doi.org/10.2105/AJPH.2004.049791>

Hyman, I., Singh, M., Ahmad, F., Austin, L., Meana, M., George, U., Wells, L. M., & Stewart, D. (2001). The role of physicians in mammography referral for older Caribbean women in Canada. *Medscape Women's Health*, 6(5), 6.

Jackson, J. S., Neighbors, H. W., Torres, M., Martin, L. A., Williams, D. R., & Baser, R. (2007). Use of mental health services and subjective satisfaction with treatment



- among Black Caribbean immigrants: Results from the National Survey of American Life. *American Journal of Public Health*, 97(1), 60–67. <https://doi.org/10.2105/AJPH.2006.088500>
- Javier, J. R., Wise, P. H., & Mendoza, F. S. (2007). The relationship of immigrant status with access, utilization, and health status for children with asthma. *Ambulatory Pediatrics: The Official Journal of the Ambulatory Pediatric Association*, 7(6), 421–430. <https://doi.org/10.1016/j.ambp.2007.06.004>
- Jensen, L. F., Pedersen, A. F., Andersen, B., & Vedsted, P. (2012). Identifying specific non-attending groups in breast cancer screening—Population-based registry study of participation and socio-demography. *BMC Cancer*, 12, 518. <https://doi.org/10.1186/1471-2407-12-518>
- Jiménez-Rubio, D., & Hernández-Quevedo, C. (2011). Inequalities in the use of health services between immigrants and the native population in Spain: What is driving the differences? *The European Journal of Health Economics: HEPAC: Health Economics in Prevention and Care*, 12(1), 17–28. <https://doi.org/10.1007/s10198-010-0220-z>
- Kaitelidou, D., Galanis, P., Economou, C., Mladovsky, P., Siskou, O., & Sourtzi, P. (2020). Inequalities Between Migrants and Non-Migrants in Accessing and Using Health Services in Greece During an Era of Economic Hardship. *International Journal of Health Services: Planning, Administration, Evaluation*, 50(4), 444–457. <https://doi.org/10.1177/0020731420902604>
- Karl-Trummer, U., Novak-Zezula, S., & Metzler, B. (2010). Access to health care for undocumented migrants in the EU: A first landscape of NowHereland. *Eurohealth*, 16(1), 13–16.
- Klaufus, L. H., Fassaert, T. J. L., & de Wit, M. A. S. (2014). Equity of access to mental health care for anxiety and depression among different ethnic groups in four large cities in the Netherlands. *Social Psychiatry and Psychiatric Epidemiology*, 49(7), 1139–1149. <https://doi.org/10.1007/s00127-014-0837-9>
- Koopmans, G. T., Uiters, E., Devillé, W., & Foets, M. (2013). The use of outpatient mental health care services of migrants vis-a-vis Dutch natives: Equal access? *The*



- International Journal of Social Psychiatry*, 59(4), 342–350.  
<https://doi.org/10.1177/0020764012437129>
- Kristiansen, M., Thorsted, B. L., Krasnik, A., & von Euler-Chelpin, M. (2012). Participation in mammography screening among migrants and non-migrants in Denmark. *Acta Oncologica (Stockholm, Sweden)*, 51(1), 28–36.  
<https://doi.org/10.3109/0284186X.2011.626447>
- Lasser, K. E., Himmelstein, D. U., & Woolhandler, S. (2006). Access to care, health status, and health disparities in the United States and Canada: Results of a cross-national population-based survey. *American Journal of Public Health*, 96(7), 1300–1307. <https://doi.org/10.2105/AJPH.2004.059402>
- Lassetter, J. H., & Callister, L. C. (2009). The impact of migration on the health of voluntary migrants in western societies. *Journal of Transcultural Nursing: Official Journal of the Transcultural Nursing Society*, 20(1), 93–104.  
<https://doi.org/10.1177/1043659608325841>
- Linne, A., Leander, K., Lindström, D., Törnberg, S., & Hultgren, R. (2014). Reasons for non-participation in population-based abdominal aortic aneurysm screening. *The British Journal of Surgery*, 101(5), 481–487. <https://doi.org/10.1002/bjs.9434>
- Liu, X., Cook, G., & Cattán, M. (2017). Support networks for Chinese older immigrants accessing English health and social care services: The concept of Bridge People. *Health & Social Care in the Community*, 25(2), 667–677.  
<https://doi.org/10.1111/hsc.12357>
- Liu, Z., Beaver, K., & Speed, S. (2015). Chinese Elders' views on their interactions in general practice: A Grounded Theory study. *Ethnicity & Health*, 20(2), 129–144.  
<https://doi.org/10.1080/13557858.2014.890176>
- Lobb, R., Pinto, A. D., & Lofters, A. (2013). Using concept mapping in the knowledge-to-action process to compare stakeholder opinions on barriers to use of cancer screening among South Asians. *Implementation Science*, 8(1), 37.  
<https://doi.org/10.1186/1748-5908-8-37>
- Loue, S., & Sajatovic, M. (2012). *Encyclopedia of immigrant health* (Springer).

- Macpherson, D. W., Gushulak, B. D., & Macdonald, L. (2007). Health and foreign policy: Influences of migration and population mobility. *Bulletin of the World Health Organization*, 85(3), 200–206. <https://doi.org/10.2471/blt.06.036962>
- Malmusi, D., Borrell, C., & Benach, J. (2010). Migration-related health inequalities: Showing the complex interactions between gender, social class and place of origin. *Social Science & Medicine* (1982), 71(9), 1610–1619. <https://doi.org/10.1016/j.socscimed.2010.07.043>
- Malmusi, D., Drbohlav, D., Dzúrová, D., Palència, L., & Borrell, C. (2014). Inequalities in healthcare access by type of visa in a context of restrictive health insurance policy: The case of Ukrainians in Czechia. *International Journal of Public Health*, 59(5), 715–719. <https://doi.org/10.1007/s00038-014-0592-4>
- Martín-López, R., Jiménez-García, R., Lopez-de-Andres, A., Hernández-Barrera, V., Jiménez-Trujillo, I., Gil-de-Miguel, A., & Carrasco-Garrido, P. (2013). Inequalities in uptake of breast cancer screening in Spain: Analysis of a cross-sectional national survey. *Public Health*, 127(9), 822–827. <https://doi.org/10.1016/j.puhe.2013.03.006>
- Meana, M., Bunston, T., George, U., Wells, L., & Rosser, W. (2001). Influences on breast cancer screening behaviors in Tamil immigrant women 50 years old and over. *Ethnicity & Health*, 6(3–4), 179–188. <https://doi.org/10.1080/13557850120078107>
- Muñoz, M.-A., Pastor, E., Pujol, J., Del Val, J. L., Cordero, S., & Hermosilla, E. (2012). Primary health care utilization by immigrants as compared to the native population: A multilevel analysis of a large clinical database in Catalonia. *European Journal of General Practice*, 18(2), 100–106. <https://doi.org/10.3109/13814788.2012.656085>
- Neergaard, M. A., Jensen, A. B., Olesen, F., & Vedsted, P. (2013). Access to outreach specialist palliative care teams among cancer patients in Denmark. *Journal of Palliative Medicine*, 16(8), 951–957. <https://doi.org/10.1089/jpm.2012.0265>
- Nielsen, S. S., Hempler, N. F., Waldorff, F. B., Kreiner, S., & Krasnik, A. (2012). Is there equity in use of healthcare services among immigrants, their descendents, and

- ethnic Danes? *Scandinavian Journal of Public Health*, 40(3), 260–270.  
<https://doi.org/10.1177/1403494812443602>
- Nielsen, S. S., Jensen, N. K., Kreiner, S., Norredam, M., & Krasnik, A. (2015). Utilisation of psychiatrists and psychologists in private practice among non-Western labour immigrants, immigrants from refugee-generating countries and ethnic Danes: The role of mental health status. *Social Psychiatry and Psychiatric Epidemiology*, 50(1), 67–76. <https://doi.org/10.1007/s00127-014-0916-y>
- Pons-Vigués, M., Puigpinós-Riera, R., Rodríguez-Sanz, M., Serral, G., Palència, L., & Borrell, C. (2011). Preventive control of breast and cervical cancer in immigrant and native women in Spain: The role of country of origin and social class. *International Journal of Health Services: Planning, Administration, Evaluation*, 41(3), 483–499. <https://doi.org/10.2190/HS.41.3.e>
- Ramos, J. M., Navarrete-Muñoz, E. M., Pinargote, H., Sastre, J., Seguí, J. M., & Rugero, M. J. (2013). Hospital admissions in Alicante (Spain): A comparative analysis of foreign citizens from high-income countries, immigrants from low-income countries, and Spanish citizens. *BMC Health Services Research*, 13, 510. <https://doi.org/10.1186/1472-6963-13-510>
- Ricardo-Rodrigues, I., Jiménez-García, R., Hernández-Barrera, V., Carrasco-Garrido, P., Jiménez-Trujillo, I., & López de Andrés, A. (2015). Social disparities in access to breast and cervical cancer screening by women living in Spain. *Public Health*, 129(7), 881–888. <https://doi.org/10.1016/j.puhe.2015.02.021>
- Rinaldi, F., Nembrini, S., Concoreggi, C., Magoni, M., & Padovani, A. (2016). Neurological diseases and health care utilization among first-generation immigrants. *Journal of Neurology*, 263(4), 714–721. <https://doi.org/10.1007/s00415-016-8029-z>
- Ruud, S. E., Aga, R., Natvig, B., & Hjortdahl, P. (2015). Use of emergency care services by immigrants—A survey of walk-in patients who attended the Oslo Accident and Emergency Outpatient Clinic. *BMC Emergency Medicine*, 15, 25. <https://doi.org/10.1186/s12873-015-0055-0>

- Saltus, R., & Pithara, C. (2015). “Care from the heart”: Older minoritised women’s perceptions of dignity in care. *International Journal of Migration, Health and Social Care*, 11(1), 57–70. <https://doi.org/10.1108/IJMHS-06-2014-0025>
- Sandvik, H., Hunskaar, S., & Diaz, E. (2012). Immigrants’ use of emergency primary health care in Norway: A registry-based observational study. *BMC Health Services Research*, 12, 308. <https://doi.org/10.1186/1472-6963-12-308>
- Sanz, B., Regidor, E., Galindo, S., Pascual, C., Lostao, L., Díaz, J. M., & Sánchez, E. (2011). Pattern of health services use by immigrants from different regions of the world residing in Spain. *International Journal of Public Health*, 56(5), 567–576. <https://doi.org/10.1007/s00038-011-0237-9>
- Simou, E., Foundoulakis, E., Kourlaba, G., & Maniadakis, N. (2011). Factors associated with the use of preventive services by women in Greece. *European Journal of Public Health*, 21(4), 512–519. <https://doi.org/10.1093/eurpub/ckq103>
- Solé-Auró, A., Guillén, M., & Crimmins, E. M. (2012). Health care usage among immigrants and native-born elderly populations in eleven European countries: Results from SHARE. *The European Journal of Health Economics*, 13(6), 741–754. <https://doi.org/10.1007/s10198-011-0327-x>
- Sourtzi, P., Galanis, P., Konstantakopoulou, O., Siskou, O., & Kaitelidou, D. (2020). Factors that influence the health status of immigrants living in Greece. *AIMS Public Health*, 7(2), 287–300. <https://doi.org/10.3934/publichealth.2020024>
- Spallek, J., Zeeb, H., & Razum, O. (2011). What do we have to know from migrants’ past exposures to understand their health status? A life course approach. *Emerging Themes in Epidemiology*, 8(1), 6. <https://doi.org/10.1186/1742-7622-8-6>
- Spinogatti, F., Civenti, G., Conti, V., & Lora, A. (2015). Ethnic differences in the utilization of mental health services in Lombardy (Italy): An epidemiological analysis. *Social Psychiatry and Psychiatric Epidemiology*, 50(1), 59–65. <https://doi.org/10.1007/s00127-014-0922-0>
- Stathopoulou, T., Stornes, P., Mouriki, A., Kostaki, A., Cavounidis, J., Avrami, L., McNamara, C. L., Rapp, C., & Eikemo, T. A. (2018). Health inequalities among migrant and native-born populations in Greece in times of crisis: The MIGHEAL

- study. *European Journal of Public Health*, 28(suppl\_5), 5–19.  
<https://doi.org/10.1093/eurpub/cky225>
- Steven, D., Fitch, M., Dhaliwal, H., Kirk-Gardner, R., Sevean, P., Jamieson, J., & Woodbeck, H. (2004). Knowledge, attitudes, beliefs, and practices regarding breast and cervical cancer screening in selected ethnocultural groups in Northwestern Ontario. *Oncology Nursing Forum*, 31(2), 305–311.  
<https://doi.org/10.1188/04.ONF.305-311>
- Straiton, M., Reneflot, A., & Diaz, E. (2014). Immigrants’ use of primary health care services for mental health problems. *BMC Health Services Research*, 14, 341.  
<https://doi.org/10.1186/1472-6963-14-341>
- Sun, Z., Xiong, H., Kearney, A., Zhang, J., Liu, W., Huang, G., & Wang, P. P. (2010). Breast cancer screening among Asian immigrant women in Canada. *Cancer Epidemiology*, 34(1), 73–78. <https://doi.org/10.1016/j.canep.2009.12.001>
- Suurmond, J., Rosenmöller, D. L., el Mesbahi, H., Lamkaddem, M., & Essink-Bot, M.-L. (2016). Barriers in access to home care services among ethnic minority and Dutch elderly – A qualitative study. *International Journal of Nursing Studies*, 54, 23–35.  
<https://doi.org/10.1016/j.ijnurstu.2015.02.014>
- Teunissen, E., van den Bosch, L., van Bavel, E., van den Driessen Mareeuw, F., van den Muijsenbergh, M., van Weel-Baumgarten, E., & van Weel, C. (2014). Mental health problems in undocumented and documented migrants: A survey study. *Family Practice*, 31(5), 571–577. <https://doi.org/10.1093/fampra/cmu038>
- The Lancet Public Health. (2018). No public health without migrant health. *The Lancet Public Health*, 3(6), e259. [https://doi.org/10.1016/S2468-2667\(18\)30101-4](https://doi.org/10.1016/S2468-2667(18)30101-4)
- Thyli, B., Hedelin, B., & Athlin, E. (2014). Experiences of health and care when growing old in Norway—From the perspective of elderly immigrants with minority ethnic backgrounds. *Clinical Nursing Studies*, 2(3), p52.  
<https://doi.org/10.5430/cns.v2n3p52>
- Todd, L., Harvey, E., & Hoffman-Goetz, L. (2011). Predicting breast and colon cancer screening among English-as-a-second-language older Chinese immigrant women to Canada. *Journal of Cancer Education: The Official Journal of the American*

*Association for Cancer Education*, 26(1), 161–169.  
<https://doi.org/10.1007/s13187-010-0141-7>

- Tsitsakis, C. A., Karasavoglou, A., Tsaridis, E., Ramantani, G., Florou, G., Polychronidou, P., & Stamatakis, S. (2017). Features of public healthcare services provided to migrant patients in the Eastern Macedonia and Thrace Region (Greece). *Health Policy (Amsterdam, Netherlands)*, 121(3), 329–337.  
<https://doi.org/10.1016/j.healthpol.2016.12.006>
- Ullmann, S. H., Goldman, N., & Massey, D. S. (2011). Healthier before they migrate, less healthy when they return? The health of returned migrants in Mexico. *Social Science & Medicine* (1982), 73(3), 421–428.  
<https://doi.org/10.1016/j.socscimed.2011.05.037>
- Vahabi, M., Lofters, A., Kumar, M., & Glazier, R. H. (2016). Breast cancer screening disparities among immigrant women by world region of origin: A population-based study in Ontario, Canada. *Cancer Medicine*, 5(7), 1670–1686.  
<https://doi.org/10.1002/cam4.700>
- Villarreal, N., & Artazcoz, L. (2016). Different Patterns in Health Care Use Among Immigrants in Spain. *Journal of Immigrant and Minority Health*, 18(2), 318–329.  
<https://doi.org/10.1007/s10903-015-0202-4>
- Woloshin, S., Schwartz, L. M., Katz, S. J., & Welch, H. G. (1997). Is language a barrier to the use of preventive services? *Journal of General Internal Medicine*, 12(8), 472–477. <https://doi.org/10.1046/j.1525-1497.1997.00085.x>
- World Health Organization. (2008). *Health of migrants*. World Health Organization.
- Yu, S. M., Huang, Z. J., Schwalberg, R. H., & Nyman, R. M. (2006). Parental English proficiency and children's health services access. *American Journal of Public Health*, 96(8), 1449–1455. <https://doi.org/10.2105/AJPH.2005.069500>
